# Supplementary material
Source: Springer Nature journal article supplement (https://www.springermedizin.de/resource/supplementary/12905_2009_191_MOESM2_ESM.pdf/9518140)
Supplement: MOESM2 [file 9518140]

Condensed meaning units are coded

Subcategories

Category

*- afraid that the man will react violently*

*-the man will blame me and think I have many sex partners*

*- I know women slandered and insulted*

Fear  
Violence  
Blame  
Knowledge  
Negative repercussions

***Stigma***

**The voice within**

*-I know telling is right but I dare not*

*-not giving him a chance to protect is selfish*

*-I might infect him and there is no other way*

Withholding information  
Selfish  
Wrongdoing  
Self-centred

***Guilt***
